1

2 Phosphorylation of a *Toxoplasma gondii* tyrosine transporter by  
3 calcium-dependent kinase 3 is important for parasite fitness.

4

5 Short Title: Phosphorylation of a tyrosine transporter in *Toxoplasma gondii*

6

7 Bethan A. Wallbank<sup>1</sup>, Caia S. Dominicus<sup>1¶</sup>, Malgorzata Broncel<sup>1¶</sup>, Nathalie  
8 Legrave<sup>2</sup>, James I. MacRae<sup>2</sup>, Henry M. Staines<sup>3</sup> and Moritz Treeck<sup>1\*</sup>

9

10 <sup>1</sup> Signalling in Apicomplexan Parasites Laboratory, The Francis Crick Institute,  
11 London, United Kingdom

12

13 <sup>2</sup> Metabolomics Science Technology Platform, The Francis Crick Institute, London,  
14 United Kingdom

15

16 <sup>3</sup> St George's, University of London, Institute of Infection and Immunity, London,  
17 United Kingdom

18

19 \* Corresponding author treeckm@crick.ac.uk (MT)

20

21 ¶These authors contributed equally to this work

## 22 **Abstract**

23 *Toxoplasma gondii* parasites rapidly exit their host cell when exposed to calcium  
24 ionophores. The calcium-dependent protein kinase 3 (*TgCDPK3*) was previously  
25 identified as a key mediator in this process, as *TgCDPK3* knockout ( $\Delta$ *cdpk3*)  
26 parasites fail to egress in a timely manner. Phosphoproteomic analysis comparing  
27 WT with  $\Delta$ *cdpk3* parasites revealed changes in the *TgCDPK3*-dependent  
28 phosphoproteome that included proteins important for regulating motility, but  
29 also metabolic enzymes, indicating that *TgCDPK3* controls processes beyond  
30 egress. Here we have investigated a predicted direct target of *TgCDPK3*, a putative  
31 transporter of the major facilitator superfamily (MFS) and show that it is rapidly  
32 phosphorylated after induction of calcium signalling. Conditional knockout (KO)  
33 of the transporter reveals an essential role in the lytic cycle during intracellular  
34 growth with a transcriptome signature of amino acid-starved parasites. Using a  
35 combination of metabolomics and heterologous expression, we confirmed a  
36 primary role in tyrosine import. Complementation with phosphorylation site  
37 mutants shows that phosphorylation of serine 56 (S56) by *TgCDPK3* gives the  
38 parasites a growth benefit in competition assays. Collectively, these findings  
39 validate an important, albeit non-essential role for *TgCDPK3* in the regulation of  
40 metabolic processes, in addition to motility.

41

## 42 **Author summary**

43 *Toxoplasma gondii* is an obligate intracellular parasite. To survive and spread  
44 throughout the host it must repeatedly infect, replicate within and exit, host cells.  
45 These recurring cycles of infection and egress rely on signalling pathways that

46 allow the parasites to sense and respond rapidly to their environment. While some  
47 key kinases and secondary messengers within these pathways have been  
48 identified, functional analysis of non-kinases has been very limited. This is  
49 especially true for candidates that are not predicted to play a role in active motility  
50 or are not known to function in established signalling pathways. Here we have  
51 followed up on an unexpected target of the *T. gondii* calcium-dependent kinase 3  
52 (*TgCDPK3*), a plant-like calcium dependent kinase, that was previously shown to  
53 play an important role in calcium-mediated exit from the host cell. We show that,  
54 in addition to controlling motility of the parasite (as previously shown), *TgCDPK3*  
55 phosphorylates an essential tyrosine transporter in the plasma membrane.  
56 Mutational analysis of the phosphorylation sites demonstrates an important role  
57 in maintaining parasite fitness, thus demonstrating that *TgCDPK3* plays a  
58 pleiotropic role in controlling both egress and metabolism.

59

## 60 **Introduction**

61 The fast growing tachyzoite stage of the protozoan parasite *Toxoplasma gondii* requires  
62 cycles of host cell invasion, replication, and lysis for its successful proliferation within  
63 the host. Each step of this lytic cycle involves tightly regulated signalling pathways, the  
64 intricacies of which remain largely unknown. Paramount to parasite survival is the  
65 ability to sense and respond to changes in the environment for which the divalent  
66 calcium ion ( $\text{Ca}^{2+}$ ) acts as an important secondary messenger (1). Changes in free  
67 intracellular  $[\text{Ca}^{2+}]_i$  levels, via release of  $\text{Ca}^{2+}$  from organellar  $\text{Ca}^{2+}$  stores, can be  
68 induced by the addition of  $\text{Ca}^{2+}$  ionophores, such as A23187 or phosphodiesterase  
69 inhibitors (2,3).  $\text{Ca}^{2+}$  flux regulates key processes including secretion of micronemes

70 prior to host cell entry (4), parasite motility (5), and host cell egress (6) and invasion  
71 (7). Inversely, these processes can all be inhibited by Ca<sup>2+</sup> immobilisers or chelators,  
72 such as BAPTA-AM (5,8–10). Ca<sup>2+</sup> release leads to the activation of Ca<sup>2+</sup> binding  
73 proteins such as calmodulins, calcineurin B-like kinases and calcium-dependent protein  
74 kinases (CDPKs). *T. gondii* calcium-dependent protein kinase 3 (*TgCDPK3*), for  
75 example, has been implicated in the regulation of ionophore induced egress, IIE (i.e.  
76 the rapid exit of tachyzoites from a host cell on addition of ionophore) and ionophore  
77 induced death, IID (i.e. the loss of infectivity of EC parasites after prolonged exposure  
78 to ionophore) (9). *TgCDPK3* KO ( $\Delta cdpk3$ ) (11), mutants (9), and chemically inhibited  
79 *TgCDPK3* lines (12) all show a deficiency in IIE and IID. *TgCDPK3* is a  
80 serine/threonine kinase belonging to a large family of CDPKs also found in plants and  
81 ciliates, but absent in humans. It is anchored to the parasite plasma membrane, via N-  
82 terminal myristoylation and palmitoylation motifs (11–13), facing the lumen of the  
83 parasite. Like all CDPKs, *TgCDPK3* possesses a C-terminal calmodulin-like domain  
84 consisting of 4 EF hands, known as the CDPK activation domain, as well as upstream  
85 autoinhibitory and catalytic domains (14). Binding of Ca<sup>2+</sup> to the EF hands causes a  
86 structural rearrangement that frees up the active site of the kinase domain, allowing for  
87 substrate phosphorylation (15,16). A quantitative phosphoproteome study revealed 156  
88 phosphorylation sites that are differentially phosphorylated between WT and  
89 *TgCDPK3* mutant parasites (17). The *TgCDPK3*-dependent phosphoproteome includes  
90 phosphorylation sites on proteins involved in parasite motility, such as the cyclase-  
91 associated protein and myosin A (Myo A), but also, and perhaps surprisingly, those  
92 involved in metabolic processes such as the  $\alpha$ -ketoacid dehydrogenase (BCKDH)  
93 subunit, E1 $\alpha$ , required for the breakdown of branched-chain amino acids (BCAAs) and  
94 conversion of pyruvate to the TCA driver acetyl-CoA (18). The link to proteins not

95 obviously involved in egress and motility, as well as changes in the phosphoproteome  
96 regardless of the presence of ionophore, suggests that *TgCDPK3* function extends  
97 beyond egress.

98 The phosphorylation site that appeared to have one of the most marked reductions in  
99 phosphorylation state in *TgCDPK3* mutants compared to WT parasites (17), is situated  
100 within a putative transporter of the MFS family (TGGT1\_257530, named ApiAT5-3 as  
101 per (19)) that has moderate homology to a BCAA transporter. Given the additional  
102 evidence from the phosphoproteomic dataset that *TgCDPK3* putatively regulates  
103 BCAA catabolism via BCKDH, we hypothesised that *TgCDPK3* might be involved in  
104 BCAA uptake and metabolism via phosphorylation of ApiAT5-3 in addition to  
105 regulating motility. Here, we have assessed the function of ApiAT5-3 and the role of  
106 *TgCDPK3*-mediated phosphorylation. We show that ApiAT5-3 is rapidly  
107 phosphorylated at serine 56 (S56) during the first minute of induced egress. Using a  
108 conditional KO approach, we show that ApiAT5-3 is essential, and that deletion leads  
109 to a delayed death phenotype that is accompanied by a transcriptional response relating  
110 to translational stress. In growth competition assays performed with parasite lines that  
111 rely on phosphomutants or phosphomimetics, we show that phosphorylation of S56  
112 appears to be important, but not essential, for parasite fitness. Finally, using a  
113 combination of metabolic analysis and heterologous expression in *Xenopus laevis*  
114 oocytes we confirm that ApiAT5-3 transports tyrosine but has only limited capacity to  
115 transport BCAAs. This data confirms that *TgCDPK3* phosphorylates several targets in  
116 its vicinity, controlling diverse processes at the plasma membrane and thus contributing  
117 to a range of biological processes in the parasite.

118

## 119 **Results**

120 **ApiAT5-3 is located at the parasite periphery and phosphorylated during ionophore**  
121 **induced egress in a *TgCDPK3*-dependent manner.**

122 ApiAT5-3 was previously identified to be phosphorylated at Serine 56 in a  
123 *TgCDPK3*-dependent manner (17). BLAST analysis using the Transporter  
124 Classification Database (<http://www.tcdb.org/>) predicts that ApiAT5-3 possesses  
125 a modest level of homology to a BCAA transporter. This was interesting, as  
126 deletion of *TgCDPK3* was previously shown to lead to upregulation of the BCKDH  
127 complex (17), involved in BCAA catabolism. This indicated that *TgCDPK3* may  
128 directly control BCAA transport by phosphorylating ApiAT5-3.

129

130 Topology prediction ([https://embnet.vital-it.ch/software/TMPRED\\_form.html](https://embnet.vital-it.ch/software/TMPRED_form.html)  
131 (20)) places the N-terminal regions of ApiAT5-3 at the luminal side of the parasite,  
132 potentially allowing for direct interaction with *TgCDPK3*, which also localises to  
133 the plasma membrane (Fig. 1A). ApiAT5-3 contains several phosphorylation sites  
134 at its N-terminus, of which S56 was the only one previously identified as being  
135 *TgCDPK3*-dependent (Fig. 1B, upper panel). It is entirely plausible, however, that  
136 kinases other than *TgCDPK3* act during egress to phosphorylate additional  
137 residues on the ApiAT5-3 N-terminus. To investigate this, we queried a dataset  
138 recently generated in our laboratory in which we have quantified, using tandem-  
139 mass-tag technology (21), phosphorylation site abundance on *T. gondii* proteins  
140 across 4 time points (0, 15, 30 and 60 s) following ionophore-treatment (Caia  
141 Dominicus, in preparation). From the ~850 phosphorylation sites that are  
142 phosphorylated or de-phosphorylated during egress, we identified S56 of ApiAT5-  
143 3 as increasingly phosphorylated over time (Fig. 1B, lower panel). We also

144 identified several proteins already known to be more phosphorylated in response  
145 to Ca<sup>2+</sup> signalling including MyoA, Myosin F and DrpB (17,22,23). None of the other  
146 phosphorylation sites on the ApiAT5-3 N-terminus increased in phosphorylation  
147 state prior to, or during egress. However, S14 of ApiAT5-3 was dephosphorylated  
148 during ionophore-treatment. Collectively these data indicate that S56 is  
149 phosphorylated in a *Tg*CDPK3-dependent manner upon Ca<sup>2+</sup> stimulation, and that  
150 a phosphatase is acting on S14 during the same period, while the other  
151 phosphorylation sites appear unaffected.

152

153 To localise ApiAT5-3 in *T. gondii* parasites we generated an RH parasite line  
154 (ApiAT5-3::HA) that expressed a C-terminally HA-epitope tagged version of  
155 ApiAT5-3 under control of its endogenous promotor (i.e. 1000 bp upstream of the  
156 start ATG). Western Blotting confirmed expression of a 42 KDa protein close to  
157 the predicted size (56 KDa) (Fig. 1C) and immunofluorescence assays (IFA)  
158 showed ApiAT5-3 predominantly at the periphery of the parasite (Fig. 1D). No  
159 ApiAT5-3::HA could be detected in nascent daughter cells, a hallmark of most  
160 inner membrane complex proteins. Together, these data suggest that ApiAT5-3  
161 localises, like *Tg*CDPK3, to the plasma membrane, and thus, could be a *bona fide*  
162 target of *Tg*CDPK3 *in vivo*.

163

#### 164 ***apiAT5-3* deletion causes delayed parasite death**

165 *ApiAT5-3* depletion is predicted to have a high fitness cost (Toxo DB 7.1 (24)).  
166 Accordingly, we generated a conditional KO using the dimerisable cre  
167 recombinase (DiCre) strategy. We replaced the endogenous copy of *apiAT5-3* with  
168 a recodonised version in RH  $\Delta ku80^{DiCre}$  parasites, by double homologous

169 recombination, using a double-guide strategy (25) (Fig. 2A). We initially placed a  
170 loxP site adjacent to the Kozac sequence of ApiAT5-3 but were unable to obtain  
171 correct integration. We hypothesised that the loxP sequence might be interfering  
172 with promoter elements and moved it 100 and 200 bp upstream of the predicted  
173 start ATG, respectively. Both of these constructs correctly integrated into the  
174 genome. Subsequent analyses were performed with the resulting ApiAT5-3\_loxP,  
175 with the loxP at ATG -100bp. Integration was confirmed by PCR amplification (Fig.  
176 2B, left panel). To test whether ApiAT5-3 is an essential gene we treated parasites  
177 for 4h with either rapamycin (RAP) or DMSO. PCR analysis showed a near  
178 complete excision of the floxed gene (Fig. 2B, right panel). Correct excision of the  
179 ApiAT5-3 open reading frame resulted in YFP positive parasites that could be  
180 readily distinguished from WT by microscopy (Fig. 2C). Upon performing plaque  
181 assays it became evident that RAP, but not DMSO-treatment, resulted in a  
182 complete block in plaque formation (Fig. 2D). A small number (<0.5%) of plaques  
183 could be identified in RAP-treated cultures, however, parasites contained in these  
184 plaques were YFP(-), indicating that they arose from non-excised parasites (data  
185 not shown). Over time these non-excised parasites within the RAP-treated  
186 population outgrew the KOs (Fig. S1), further reinforcing the fact that ApiAT5-3 is  
187 essential for parasite survival. These non-excising parasites (termed ApiAT5-  
188 3\_loxP<sup>ΔdiCre</sup>), which presumably possess a non-functioning diCre recombinase,  
189 were isolated and used as controls for subsequent experiments, as detailed below.  
190  
191 To visualise at which time points ApiAT5-3 is important, we followed replication  
192 of live RAP-treated ApiAT5-3\_loxP parasites over 3 lytic cycles, where each lytic  
193 cycle is defined as growth over 36 hrs, before passage into a fresh culture dish



194 containing host cells. This analysis revealed that in the first cycle, RAP-treated  
195 (*apiAT5-3* KO) parasite numbers and replication rate remained comparable to  
196 DMSO-treated (WT) parasites (Fig. 2E). However, by 36 hrs into the second  
197 replicative cycle there was a 60.7% decrease in the number of vacuoles with more  
198 than 16 parasites compared to the DMSO control. By the end of the 3<sup>rd</sup> cycle the  
199 *apiAT5-3* KO parasites consisted largely of 2 or fewer parasites/vacuole, even  
200 after the WT had successfully egressed (48 hrs into cycle). To better identify  
201 phenotypic consequences of *apiAT5-3* deletion, we followed replication over time  
202 using live-video microscopy. We started recording 29 hrs into the third lytic cycle  
203 post RAP-treatment, by which time *apiAT5-3* KO parasites display a marked  
204 growth defect. To facilitate a more accurate comparison between *apiAT5-3* KO and  
205 WT parasites, tdTomato expressing RH parasites (RH Tom) were spiked into the  
206 imaging wells at a 1:1 ratio. These analyses revealed that *apiAT5-3* KO does not  
207 lead to early egress or an inability to invade, but rather a lack of replication, often  
208 with the ability to undergo a first division, but failing to go beyond 2  
209 parasites/vacuole (Fig. 2F, Movies S1A and B).

210 As we showed that ApiAT5-3 is phosphorylated directly after ionophore-  
211 treatment (Fig. 1B), we postulated that it may be required for ionophore induced  
212 egress. To assess this, we performed egress assays of the DMSO- and RAP-treated  
213 lines in the presence of 8  $\mu$ M Ca<sup>2+</sup> ionophore. However, there was no significant  
214 difference between the KO and WT (Fig. 2G) suggesting that phosphorylation of  
215 ApiAT5-3, in response to elevated Ca<sup>2+</sup> levels, plays a role in processes other than  
216 egress.

217

218 ***apiAT5-3* KO parasites display a transcriptional response related to amino acid**  
219 **starvation**

220 Deletion of a transporter may lead to up-regulation of alternative transporters or  
221 may manifest as a stress response that carries a detectable signature. To  
222 investigate this, we measured transcript levels using RNAseq, comparing RAP-  
223 treated *ApiAT5-3\_loxP* with *ApiAT5-3\_loxP<sup>ΔDiCre</sup>* parasites, which, as mentioned  
224 previously, do not excise the endogenous locus, even when treated with RAP. RNA  
225 was isolated in biological triplicate at 4 hrs post RAP-treatment, the time point at  
226 which we did not expect to see major changes in the transcriptome, and 60 hrs  
227 post treatment, by which time point the RAP-treated *ApiAT5-3\_loxP* parasites are  
228 still viable but start to display a growth defect. Indeed, at 4 hrs transcripts from  
229 the *apiAT5-3* gene were only slightly reduced in the RAP-treated *ApiAT5-3\_loxP*  
230 parasites compared to the RAP-treated *ApiAT5-3\_loxP<sup>ΔDiCre</sup>* parasites (17.1%). In  
231 contrast, at 60 hrs post RAP-treatment, a 64.7% reduction was observed (Fig. 3A).  
232 Unexpectedly, only 435 transcripts showed a statistically significant differential  
233 expression between the WT and *apiAT5-3* KO parasites at the 60 hrs time point,  
234 compared to the 4 hrs time point, indicating a modest transcriptional response to  
235 *apiAT5-3* deletion (Fig. 3B). GO-term analysis of the differentially transcribed  
236 genes showed most enrichment (5.41-fold) for genes important for translation.  
237 Among this enriched group, these genes encode almost exclusively genes for  
238 ribosomal proteins (Fig. 3C, Table S3). No single transporter was specifically up-  
239 regulated, indicating that there is no rapid transcriptional compensation when  
240 *apiAT5-3* is deleted.

241

242 Collectively these data show that ApiAT5-3 is an essential protein that is required  
243 for intracellular replication. Its depletion leads to a complete arrest in growth  
244 which is not accompanied by a substantial stress response, but rather modest  
245 signs of translational stress.

246

247 **Mutation of S56 to alanine, but not a phosphomimetic leads to a reduction in fitness.**

248 Having established that ApiAT5-3 is essential for the lytic cycle, we next sought to  
249 examine the role of *Tg*CDPK3-mediated phosphorylation in ApiAT5-3 function. To  
250 do this, we complemented ApiAT5-3\_loxP parasites with either WT ApiAT5-3, or  
251 variants where S56 is mutated to alanine (S56A) or to aspartic acid (S56D). To  
252 prevent possible differences in growth between the parasite lines due to  
253 differential expression of the complementation constructs, we inserted each into  
254 the *uprt* locus by double homologous recombination, under control of the  
255 endogenous promoter (Fig. 4A). Complementation into the *uprt* locus was verified  
256 by PCR (Fig. 4B). The complementation constructs also carried a C-terminal HA  
257 epitope tag to verify correct trafficking to the plasma membrane.  
258 Immunofluorescence displayed correct trafficking in all variants (Fig. 4C).

259 To compare fitness between the WT, the phosphomimetic (S56D), and the  
260 phosphomutant (S56A) complemented lines in the absence of *apiAT5-3*, we  
261 deleted the endogenous copy using RAP-treatment. This results in parasite strains  
262 that solely rely on the complemented copy of the gene. We confirmed correct  
263 excision of *apiAT5-3* by virtue of YFP expression post RAP-treatment, and PCR  
264 analysis (Fig. 4C, Fig. S2A). RAP-treated parasite lines were viable and allowed us  
265 to isolate clones by limiting dilution, all of which restored growth in plaque assays  
266 (Fig. S2B). This shows that i) complementation of *apiAT5-3* by expression at the

267 *uprt* locus fully restores ApiAT5-3 function and ii) that neither the introduction of  
268 phosphomimetics nor phosphomutants of S56 are lethal to parasite growth.  
269 This is not surprising as deletion of *TgCDPK3*, the kinase putatively responsible  
270 for ApiAT5-3 phosphorylation during egress, does not lead to a severe growth  
271 phenotype. Accordingly, phosphomutants would not be expected to display  
272 drastic differences in growth. We therefore performed competition assays in  
273 which we compared growth of YFP expressing complementation lines that fully  
274 rely on the complementation variant for growth ( $\Delta apiAT5-3^{ApiAT5-3/S56A/S56D}$ )  
275 mixed in a 1:1 ratio with their non-excised, colourless counterpart (ApiAT5-  
276  $3^{ApiAT5-3/S56A/S56D}$ ). Using the ratio of 4',6-diamidino-2-phenylindole (DAPI) stained  
277 parasites (DAPI labels the DNA of all parasites) and YFP expressing parasites (YFP  
278 is expressed only in the complementation lines) we followed growth over 14 days  
279 in biological triplicates. While  $\Delta apiAT5-3^{ApiAT5-3}$  parasites showed no difference in  
280 growth compared to their WT control,  $\Delta apiAT5-3^{ApiAT5-3_{S56A}}$  was reduced by  
281 84.0% after 14 days (Fig. 4D). Strikingly,  $\Delta apiAT5-3^{ApiAT5-3_{S56D}}$  was not  
282 outcompeted and grew at similar levels to the WT control.

283 Collectively these data indicate that phosphorylation of S56 while not essential, is  
284 important for intracellular growth.

285

### 286 **ApiAT5-3 is a primary transporter of tyrosine, but not branched chain amino acids**

287 The predicted homology of ApiAT5-3 to a BCAA transporter and the profound up-  
288 regulation of the BCKDH complex in  $\Delta cdpk3$  parasites suggested a direct role for  
289 ApiAT5-3 in BCAA transport. To test this, we expressed *apiAT5-3* in the  
290 heterologous expression system, *X. laevis* oocytes. Concurrently with our study,  
291 data were presented that ApiAT5-3 may be a tyrosine transporter (Giel van

292 Dooren, personal communication and pre-published in BioRx (19)). We therefore  
293 tested BCAA import and replicated the tyrosine uptake capacity of ApiAT5-3 in  
294 oocytes expressing WT ApiAT5-3 (Fig. 5A). Measuring unidirectional influx, we  
295 observed a significant (4.0-fold) increase in the uptake of <sup>14</sup>C-tyrosine into  
296 ApiAT5-3-expressing oocytes compared to either water-injected or uninjected  
297 control oocytes under the conditions tested, consistent with results from (19). We  
298 also observed moderate ApiAT5-3-dependent phenylalanine influx, but not for the  
299 BCAA valine (Fig. S3A), suggesting that, while ApiAT5-3 is capable of tyrosine  
300 transport, it is unlikely to be a major BCAA transporter.

301 To verify the role of ApiAT5-3 in tyrosine transport in our conditional KO  
302 parasites, we measured intracellular <sup>13</sup>C-tyrosine levels in RAP-treated  $\Delta$ apiAT5-  
303 <sup>3</sup>ApiAT5-3 (WT) and ApiAT5-3\_loxP (KO) parasites (74 hrs post excision), after 1 hr  
304 in the presence of growth media containing <sup>13</sup>C-tyrosine. In an analogous manner,  
305 we also measured <sup>13</sup>C-isoleucine uptake in order to verify if ApiAT5-3 is also a  
306 BCAA transporter.  $\Delta$ apiAT5-3<sup>3</sup>ApiAT5-3 was used instead of DMSO-treated ApiAT5-  
307 3\_loxP to control for any potential effects of rapamycin on parasite metabolism.  
308 This analysis verified a reduction of <sup>13</sup>C-labelled tyrosine uptake (40.5%  
309 compared to  $\Delta$ apiAT5-3<sup>3</sup>ApiAT5-3), but not isoleucine uptake (4.3% compared to  
310  $\Delta$ apiAT5-3<sup>3</sup>ApiAT5-3) (Fig. 5B). We also measured the intracellular abundance of all  
311 detectable amino acids when labelling with <sup>13</sup>C-tyrosine. We observed a reduction  
312 of intracellular tyrosine abundance (63.2%) in the  $\Delta$ apiAT5-3<sup>3</sup>ApiAT5-3 cells (as  
313 expected), but not phenylalanine which was slightly increased in relative  
314 abundance (17.45%), suggesting that while ApiAT5-3 is able to transport  
315 phenylalanine in oocytes, it is not the major phenylalanine transporter in *T. gondii*

316 (Fig. S3B). It is important to note that our metabolome analysis was performed at  
317 the end of cycle 2 after RAP-treatment, when  $\Delta apiAT5-3^{ApiAT5-3}$  parasites are still  
318 viable but start to display a reduction of growth (Fig. 2e). Therefore, we predict  
319 that low levels of  $ApiAT5-3^{ApiAT5-3}$  present at this stage are responsible for the  
320 residual transport of tyrosine. Interestingly, we also observed a reduction in  
321 intracellular aspartate (38.5%) and glycine (28.3%) in  $\Delta apiAT5-3^{ApiAT5-3}$  cells (Fig.  
322 S3B). Since *T. gondii* is not known to be auxotrophic for these amino acids we  
323 reasoned that the observed death phenotype is unlikely caused by a defect in  
324 glycine or aspartate import, and instead focussed our subsequent analysis on  
325 tyrosine. We also observed an increase in the abundance of glutamine, valine,  
326 isoleucine and proline, indicating potential wider metabolic effects.

327

328 To test whether exogenous tyrosine can complement the loss of  $ApiAT5-3$  we  
329 grew parasites in media with 5× the normal amount of tyrosine (2 mM). Despite  
330 various attempts to restore normal growth or generate  $\Delta apiAT5-3$  clonal lines, we  
331 could not obtain viable parasites in high tyrosine (Fig. 5C). In other organisms,  
332 phenylalanine can be converted into tyrosine. Therefore, we tested whether  
333 phenylalanine supplementation (2 mM) can rescue the growth phenotype of  
334  $apiAT5-3$  KO parasites. No growth rescue could be observed (data not shown).  
335 Together, these results suggest that  $ApiAT5-3$  is the only transporter of tyrosine  
336 in *T. gondii* and that phenylalanine cannot be readily converted into tyrosine in *T.*  
337 *gondii* parasites.

338

339 To identify whether differences in phosphorylation state of  $ApiAT5-3$  affected  
340 tyrosine transport, we performed isotopic tyrosine labelling of extracellular

341 parasites using the  $\Delta\text{apiAT5-3}^{\text{ApiAT5-3\_S56A}}$  and  $\Delta\text{apiAT5-3}^{\text{ApiAT5-3\_S56D}}$   
342 phosphomutant strains. No significant differences could be observed in these  
343 assays indicating that, if tyrosine import is affected, differences may be obstructed  
344 by the intrinsic variability of the assay (data not shown).  
345 The fitness phenotype of mutating S56 to alanine is modest in a single lytic cycle  
346 and thus not predicted to have substantial impact on the import of tyrosine.  
347 Because we could not measure differences in tyrosine import in our  
348 phosphorylation site mutants we turned to heterologous assays where we  
349 expressed ApiAT5-3 WT, S56A and S56D in *X. laevis* oocytes and tested tyrosine  
350 uptake. Although there was a trend towards a reduction in tyrosine uptake in the  
351 S56A expressing oocytes (average 19.5% reduction in S56A relative to WT  
352 ApiAT5-3 expressing oocytes), this difference was not statistically significant (Fig.  
353 5D). The S56D expressing oocytes display a marginal increase in tyrosine uptake  
354 of 14.0%, that again was not statistically significant.  
355 Collectively these data show that conditional deletion of ApiAT5-3 causes a lethal  
356 reduction in tyrosine import that cannot be compensated for by amino acid  
357 supplementation. We also show that while phosphorylation of ApiAT5-3 at S56 is  
358 not required for tyrosine transport, mutating that site to alanine does lead to a  
359 subtle decrease in tyrosine transport in a heterologous assay.

360

## 361 **Discussion**

362 *Tg*CDPK3 has previously been implicated in controlling distinct biological  
363 processes such as gliding motility and metabolism. How these are linked, however,  
364 has been unclear. Mutants that display only IIE and IID phenotypes have been

365 identified (9,26), arguing that *Tg*CDPK3 may be an upstream regulator of both  
366 processes. Here we show that upon activation by the Ca<sup>2+</sup> ionophore A23187,  
367 *Tg*CDPK3 leads to an increase in ApiAT5-3 phosphorylation at S56. This occurs at  
368 the same time, and to a similar intensity, as other previously identified targets of  
369 *Tg*CDPK3 (e.g. serine 21/22 of MyoA) and other kinases involved in signalling (e.g.  
370 *Tg*CDPK1). MyoA and ApiAT5-3 are both located at, or close to, the plasma  
371 membrane. It is conceivable that, upon activation, *Tg*CDPK3 phosphorylates  
372 proteins at the plasma membrane, some of which are important for motility and  
373 others (e.g. transporters) that prepare the parasite for the extracellular milieu. In  
374 this study we have identified a function for the phosphorylation of S56, which  
375 becomes rapidly phosphorylated prior to egress in a *Tg*CDPK3-dependent  
376 manner. Interestingly, ApiAT5-3 possesses several other phosphorylation sites in  
377 its N-terminus, aside from S56, that either do not change in phosphorylation state  
378 or, in the case of S14, appear dephosphorylated during induced Ca<sup>2+</sup> signalling.  
379 How S14 dephosphorylation and S56 phosphorylation are controlling ApiAT5-3  
380 function requires further investigation, however it is evident that mutating S56 to  
381 a non-phosphorylatable residue substantially reduces parasite fitness.  
382 Phosphorylation of transporters has been shown to regulate affinity, specificity  
383 and flux of cargo (27–32). Accordingly, the observed fitness cost in S56A mutants  
384 could be indicative of a reduction in tyrosine import, for which the parasite is  
385 auxotrophic (33).

386 While we observed a clear role for ApiAT5-3 in tyrosine transport, expression of  
387 the ApiAT5\_S56A phosphomutant only led to a modest reduction in tyrosine  
388 import in oocytes, which was not statistically significant. One explanation could  
389 be that the effect on tyrosine import is beyond the limit of detection in our assays.



390 We observed an 84.0% reduction in growth of  $\Delta$ *apiAT5-3*<sup>ApiAT5-3\_S56A</sup> mutants  
391 compared to WT parasites over 14 days. This translates into a reduced replication  
392 rate of ~6.74% per 24 hrs. Tyrosine uptake assays in oocytes, as well as in  
393 extracellular parasites are, for reasons of cell viability, performed in <1 hr, and  
394 may therefore not pick up the subtle differences predicted to occur if tyrosine is  
395 the only limiting factor in these assays. Furthermore, as indicated above, ApiAT5-  
396 3 shows a complex phosphorylation pattern at its N-terminus and other  
397 phosphorylation sites could contribute to ApiAT5-3 regulation. Mimicking these  
398 conditions in a heterologous assay, or in parasites, without prior knowledge of the  
399 abundance of the phosphorylation on each of these residues becomes hard to  
400 interpret and should be the subject of further studies.

401 Apart from regulating amino acid transport, phosphorylation of transporters has  
402 also been shown to regulate trafficking to the surface (34–36). However, a role for  
403 S56 in trafficking is less likely for two reasons: i) we did not observe any obvious  
404 defects in surface translocation of the transporter in parasites and ii) *Tg*CDPK3  
405 phosphorylates S56 shortly before, or during egress, at which state the  
406 transporter is already on the surface. If S56 phosphorylation was important for  
407 surface translocation, we would expect this to occur at an earlier stage. However,  
408 we cannot exclude the possibility that minor differences in trafficking capacity  
409 impact tyrosine transport, resulting in the growth phenotype.

410 Whatever the molecular explanation for the phenotype, it is evident that  
411 *Tg*CDPK3-mediated phosphorylation of ApiAT5-3 is important for parasite fitness.

412

413 Interestingly we haven't been able to rescue the effect of *apiAT5-3* loss in our  
414 conditional KO parasites through growth in high tyrosine concentrations. These

415 results differ from those in Parker, K., *et al* whereby growth can, at least partially,  
416 be rescued in high tyrosine medium (19). One mechanism to counter low tyrosine  
417 levels that most organisms possess, is the ability to convert phenylalanine into  
418 tyrosine, via the enzyme phenylalanine-4-hydroxylase (AAH). However, the lack of  
419 tyrosine import in ApiAT5-3 conditional KO's cannot be overcome in the presence  
420 of high levels of phenylalanine, indicating that this pathway is not available.  
421 Indeed, both isoforms of AAH (AAH1 and AAH2) have recently been shown to be  
422 secreted into the host cell during *Toxoplasma* infection, where they would be  
423 unable to rescue a tyrosine transporter defect in the plasma membrane (33,37).  
424 Another explanation as to why Parker, K., *et al.* have successfully rescued the  
425 effects of *apiAP5-3* deletion through addition of excess tyrosine, could be via the  
426 upregulation of alternative transporters. Although a small amount of tyrosine  
427 appears to be imported in our *apiAT5-3* KO line (Fig. 5B), this is likely due to the  
428 presence of residual ApiAT5-3 protein in the plasma membrane after RAP-  
429 treatment. Along with our inability to rescue growth upon tyrosine  
430 supplementation, we conclude that this residual tyrosine import is unlikely due to  
431 an alternative transporter. Further to this, our transcriptomic analysis argues  
432 against a rapid sensing and transcriptional compensation for the lack of tyrosine  
433 import, so if upregulation of alternative transporters occurs, it will be a slow  
434 process. Another explanation may be that slight differences in the genetic  
435 background or passage history, and potential epigenetic changes in the parental  
436 strains, leads to a difference in capacity for amino acid transport. There is some  
437 indication that this may be the case as, in our metabolomics experiments, the  
438 ApiAT5-3 deletion showed reduced levels of glycine and aspartic acid in addition  
439 to tyrosine, while in Parker et al., other amino acids were observed to be less

440 abundant in addition to tyrosine. We also saw an increase in abundance of some  
441 amino acids that differ from Parker, K *et al.* It may be interesting in the future, to  
442 compare our *apiAT5-3* KO with that of Parker, K., *et al.* and identify any  
443 compensatory mechanisms the parasites can use to adjust to tyrosine starvation.  
444 Interestingly, deletion of *apiAT5-3* leads to a growth arrest that is not  
445 accompanied by major transcriptional responses. This is reminiscent of the  
446 hibernation state in *Plasmodium falciparum*, whereby depletion of isoleucine, an  
447 essential amino acid for this parasite, leads to arrest in growth without a major  
448 stress response (38). This would suggest that translational arrest may be a  
449 common response among apicomplexan parasites during amino acid starvation.

450

451 In summary we show that *ApiAT5-3*, a novel *T. gondii* tyrosine transporter, is  
452 rapidly phosphorylated in a *TgCDPK3* dependent manner at S56 prior to, and  
453 during egress from the host cell. The phosphorylation of S56 appears important  
454 for parasite fitness. These results, together with previous studies, support the  
455 notion that *TgCDPK3* simultaneously targets several proteins in, or at, the plasma  
456 membrane, controlling very divergent biological processes, such as motility and  
457 metabolism. The phenotypes observed in  $\Delta cdpk3$  parasites may therefore be an  
458 accumulation of effects on various proteins, which is likely true for other kinases  
459 as well.

460

## 461 **Materials and Methods**

### 462 **Parasite culture**

463 *T. gondii* parasites were cultured in a confluent monolayer of human foreskin  
464 fibroblasts (HFFs) maintained in Dulbecco's Modified Eagle Medium (DMEM),  
465 GlutaMAX supplemented with 10% foetal bovine serum, at 37°C and 5% CO<sub>2</sub>.

466

### 467 **Plasmid and parasite strain generation**

468 A comprehensive list of primers and parasite lines used throughout this study are  
469 described in S1 and S2 Tables respectively. To generate the epitope tagged  
470 ApiAT5-3::HA line, the *apiAT5-3* gene and associated 5' UTR were PCR-amplified  
471 from RH *T. gondii* gDNA using the primers 1 and 2 and cloned using Gibson  
472 assembly (39) into pGRA::HA::HPT (40), linearised with HindIII and NcoI. 25 µg of  
473 the pGRA::ApiAT5-3::HA vector was transfected into RH  $\Delta$ *hxgp*rt parasites as  
474 previously described (41). 16-20 hrs after transfection, transgenic parasites were  
475 selected using 25 µM mycophenolic acid (MPA) and 50 µg/ml xanthine (XAN). To  
476 generate the ApiAT5-3<sub>loxP</sub> conditional KO lines, the *apiAT5-3* 5'UTR was first  
477 PCR-amplified from gDNA with primers 3 and 4. This PCR product was inserted,  
478 along with the synthetic DNA constructs *loxP\_apiAT5-3\_loxP\_yfp* and *loxP(-*  
479 *100)\_apiAT5-3* (see S1 Table for full sequences), by Gibson assembly into  
480 pG140::Actin::YFP (42) that had been PCR-amplified using primers 5 and 6 to  
481 remove the actin gene. 2 µg of the subsequent pG140::ApiAT5-3<sub>loxP</sub>::YFP  
482 plasmid was linearised with ScaI and co-transfected into RH  $\Delta$ *ku80* $\Delta$ *hxgp*rt with  
483 pSag1::Cas9-U6::dbl-sgApiAT5-3, in a molar ratio of 1:10. The pSag1::Cas9-  
484 U6::dbl-sgApiAT5-3 vector was generated by PCR-amplification of the

485 pSag1::Cas9-U6 (43) vector using primers 7 and 8 to insert the 5' gRNA (gRNA 1)  
486 and 9 and 8 to insert the 3' gRNA (gRNA 2), prior to re-ligation with T4 DNA Ligase  
487 (New England Biolabs M0202). gRNA 1 was then amplified using primers 10 and  
488 11 and Gibson cloned into the pSag1::Cas9-U6::sg2ApiAT5-3 that had been  
489 linearised with KpnI and XhoI as per (25). Transgenic parasites were selected  
490 using MPA/XAN as described for pGRA::ApiAT5-3::HA. 5' and 3' integration was  
491 confirmed using primer pairs 12 and 13, and 14 and 15 respectively. Absence of  
492 WT *apiAT5-3* was confirmed using primers 16 and 17. DiCre-mediated *apiAT5-3*  
493 excision was induced with the addition of 50 nM RAP to ApiAT5-3\_loxP parasites  
494 for 4 hrs. Excision was confirmed using primers 13 and 16. To introduce an ectopic  
495 copy of *apiAT5-3* into the *uprt* gene locus, the *apiAT5-3* gene, and associated 5'  
496 UTR, were PCR-amplified from gDNA using primers 18 and 19 which was then  
497 inserted into the BamHI/ PacI digested pUPRT::DHFR-D vector (Addgene plasmid  
498 #58258 (43)) using Gibson assembly. To generate the pUPRT::ApiAT5-  
499 3\_S56A::HA and pUPRT::ApiAT5-3\_S56D::HA vectors, the pUPRT::ApiAT5-3::HA  
500 vector was modified by site directed mutagenesis using the primers 20 and 21  
501 (S56A) or 22 (S56D). pUPRT::ApiAT5-3::HA, pUPRT::ApiAT5-3\_S56A::HA and  
502 pUPRT::ApiAT5-3\_S56D::HA were linearised with PciI prior to the co-transfection  
503 of 2 µg into RH  $\Delta ku80\Delta hxpprt$  ApiAT5-3\_loxP with pSag1::Cas9-U6::sgUPRT  
504 (Addgene 54467 (43)) in a molar ratio of 1:10. Transgenic parasites were selected  
505 by the addition of 5 µM 5'-fluoro-2'-deoxyuridine to culture medium, 16-20 hrs post-  
506 transfection. Integration into the genome was confirmed using primer pairs 24  
507 and 25, and 26 and 27 respectively. Absence of *uprt* was confirmed using primers  
508 28 and 29.

509

510 **Western blotting and immunofluorescent imaging**

511 For Western blot analysis, intracellular parasites were lysed in Laemmli buffer (60  
512 mM Tris-HCl pH6.8, 1% SDS, 5% glycerol, 5% b-mercaptoethanol, 0.01%  
513 bromophenol blue) and heated to 37°C for 30 mins prior to separation on a 10%  
514 sodium dodecyl-polyacrylamide gel. Proteins were transferred onto a  
515 nitrocellulose membrane prior to blocking in 3% milk, 0.1% Tween-20 PBS. HA-  
516 tagged ApiAT5-3 was detected using rat anti-HA (1:500), followed by goat anti-rat  
517 horseradish peroxidase-conjugated secondary antibody (1:2500).

518 IFA's were performed on intracellular parasites grown in HFFs on glass coverslips.  
519  $1 \times 10^5$  parasites were seeded 24 hrs prior to fixation with 3% formaldehyde (FA).  
520 PBS 0.1% Triton X-100 was added to the fixed cells for 10 mins prior to blocking  
521 with 3% bovine serum albumin in PBS for 1 hr. ApiAT5-3::HA was visualised using  
522 rat anti-HA (1:500) followed by addition of Alexa488 conjugated donkey anti-rat  
523 secondary antibody (1:2000) and DAPI, 5 µg/ml.

524 **Plaque assay and amino acid complementation**

525 For plaque assay analysis, 150 parasites were seeded on confluent HFF  
526 monolayers, grown in 24-well plates, and left undisturbed for 5 days, before fixing  
527 with chilled methanol and staining with 0.1% crystal violet. To assess growth in  
528 excess tyrosine, plaque assays were repeated either at normal tyrosine levels (400  
529 µM L-tyrosine disodium salt; as per Gibco manufacturer) or in DMEM  
530 supplemented with 2mM L-tyrosine disodium salt (dissolved for 1 hour at 50 °C).  
531 To ensure tyrosine had successfully dissolved samples of the media were analysed  
532 by GC-MS as previously described (18).

533 **Replication assay**

534  $2 \times 10^4$  ApiAT5-3\_loxP parasites were seeded in triplicate on confluent HFFs in  
535 both culture flasks and glass bottom 8-well imaging plates and left to invade for 1  
536 hour prior to treatment with 50 nM RAP or equivalent volume DMSO, for 4 hrs.  
537 Parasites were imaged at 24, 36 and/or 48 hrs and split at 36 hrs into new flasks  
538 and imaging wells for the subsequent replication cycle. At each time point  
539 parasites were fixed in 3% FA and imaged on a Nikon Eclipse Ti-U inverted  
540 fluorescent microscope. Parasites/vacuole were counted manually from 5 fields  
541 of view at 20 $\times$  magnification using the Nikon NIS-Elements software.

542

543 **Live cell microscopy**

544 ApiAT5-3\_loxP parasites were treated with RAP or DMSO as previously described.  
545 36 hrs into cycle 2 post RAP-treatment parasites were syringe lysed and seeded  
546 in glass bottom, 8-well imaging plates in a 1:1 ratio with RH Tom parasites. After  
547 a further 29 hrs, live parasites were imaged on a Nikon Eclipse Ti-U inverted  
548 fluorescent microscope every 30 mins for the next 30 hrs, in a temperature-  
549 controlled chamber at 37 °C and 5% CO<sub>2</sub>. Images were analysed using the Nikon  
550 NIS-Elements software.

551

552 **Ionophore induced egress and death assays**

553 ApiAT5-3\_loxP parasites were seeded in 96-well imaging plates at a MOI of 0.5, 36  
554 hrs post RAP/DMSO-treatment. Ionophore induced egress assays were performed  
555 in triplicate at 37 °C in Ringers buffer (155 mM NaCl, 3 mM KCl, 2 mM CaCl<sub>2</sub>, 1 mM  
556 MgCl<sub>2</sub>, 3 mM NaH<sub>2</sub>PO<sub>4</sub>, 10 mM HEPES, 10 mM glucose) 30 hrs later. The parasites

557 were incubated with 8  $\mu\text{M}$   $\text{Ca}^{2+}$  ionophore A23187 for 0, 0.5, 1, 1.5, 2, 2.5, 3, 3.5, 4  
558 and 5 mins prior to the addition of 16% FA to a final concentration of 3% for 15  
559 mins. Wells were subsequently washed with PBS and stained with 5  $\mu\text{g}/\text{ml}$  DAPI.  
560 Automated image acquisition of 25 fields per well was performed on a Cellomics  
561 Array Scan VTI HCS reader (Thermo Scientific) using a 20 $\times$  objective. Image  
562 analysis was performed using the Compartmental Analysis BioApplication on HCS  
563 Studio (Thermo Scientific).

564

### 565 **Competition assays and flow cytometry**

566  $5 \times 10^6$  *ApiAT5-3<sup>ApiAT5-3</sup>*, *ApiAT5-3<sup>ApiAT5-3\_S56A</sup>* and *ApiAT5-3<sup>ApiAT5-3\_S56D</sup>* parasites  
567 were mixed in a 1:1 ratio with  *$\Delta$ apiAT5-3<sup>ApiAT5-3</sup>*,  *$\Delta$ apiAT5-3<sup>ApiAT5-3\_S56A</sup>* and  
568  *$\Delta$ apiAT5-3<sup>ApiAT5-3\_S56D</sup>* respectively.  $5 \times 10^4$  parasites were added to fresh HFF  
569 monolayers before spinning the rest of the sample at  $72 \times g$  to remove host cell  
570 debris for 1 min. The supernatant was spun at  $2049 \times g$  for 5 mins. The pellet was  
571 fixed for 10 mins in 3% FA, washed in PBS and stained with 5  $\mu\text{g}/\text{ml}$  DAPI. The  
572 sample was washed and resuspended in PBS before running on a flow cytometer.  
573 All parasites were gated on DAPI fluorescence to prevent results being skewed by  
574 remaining unstained host cell debris. The proportion of DAPI (+); YFP (+)  
575 (representing  *$\Delta$ apiAT5-3<sup>ApiAT5-3/S56A/S56D</sup>*) compared to DAPI (+); YFP (-)  
576 (representing *ApiAT5-3<sup>ApiAT5-3/S56A/S56D</sup>*) was calculated. The process was  
577 repeated 14 days later for comparison to day 0.

578



579 **Oocyte maintenance and radiotracer uptake assays**

580 *ApiAT5-3*, *ApiAT5-3\_S56A* and *ApiAT5-3\_S56D* were PCR amplified from  
581  $\Delta*apiAT5-3*^{*ApiAT5-3*}$ ,  $\Delta*apiAT5-3*^{*ApiAT5-3_S56A*}$  and  $\Delta*apiAT5-3*^{*ApiAT5-3_S56D*}$  cDNA,  
582 respectively, using primers 30 and 31 to add a region of homology to the XkbN  
583 plasmid at the 5' end and a HA tag to the 3' end of each gene. These fragments were  
584 then amplified with primers 32 and 33 to add a 3' XkbN homology overhang. These  
585 resulting fragments were inserted by Gibson assembly into the XkbN1\_*PfHT* (a  
586 version of pSPGT1 (44) with a NotI site added to the MCS, provided by Ksenija  
587 Slavic) which had been digested with BglIII and NotI, to remove the *PfHT* gene. The  
588 resulting XkbN\_*ApiAT5-3*, XkbN\_*ApiAT5-3\_S56A* and XkbN\_*ApiAT5-3\_S56D*  
589 plasmids were linearised with XbaI for in vitro transcription using the Thermo  
590 Fisher mMessage mMachine transcription kit. Stage V to VI defolliculated *X. laevis*  
591 oocytes were obtained commercially (Ecocyte Biosciences) for subsequent  
592 functional transport studies. Oocytes were microinjected with cRNA (20 to 40 ng  
593 in 30 nl of water) encoding *apiAT5-3* template or with a comparable amount of  
594 diethylpyrocarbonate-treated water. The oocytes were maintained at 18 °C in  
595 oocyte Ringer 2 buffer (82.5 mM NaCl, 2.5 mM KCl, 1.5 mM CaCl<sub>2</sub>, 1mM Na<sub>2</sub>HPO<sub>4</sub>,  
596 1 mM MgCl<sub>2</sub> and 5 mM HEPES) and used for transport studies 72 hrs after cRNA  
597 injection. Transport measurements were performed at room temperature on  
598 groups of 10 oocytes in ND96 medium (96 mM NaCl, 2 mM KCl, 2 mM CaCl<sub>2</sub>, 1 mM  
599 MgCl<sub>2</sub> and 5 mM HEPES) containing 1 μM radiolabelled U-<sup>14</sup>C-L-tyrosine (specific  
600 activity of 486 mCi/mmol; Perkin Elmer), U-<sup>14</sup>C-L-phenylalanine (specific activity  
601 of 508 mCi/mmol; Perkin Elmer) or U-<sup>14</sup>C-L-valine (specific activity of 271  
602 mCi/mmol; Perkin Elmer). Transport was measured at 10 min, over which time

603 uptake of L-tyrosine is linear (19). Each result was confirmed by at least 3  
604 independent experiments.

605

#### 606 **Metabolite labelling and extraction**

607 *ApiAT5-3\_loxP*,  $\Delta$ *apiAT5-3*<sup>ApiAT5-3</sup>,  $\Delta$ *apiAT5-3*<sup>ApiAT5-3\_S56A</sup> and  $\Delta$ *apiAT5-3*<sup>ApiAT5-3\_S56D</sup>  
608 parasites were treated in triplicate with 50 nM RAP and, at the end of the first  
609 cycle, seeded in 15 cm culture flasks. Stable isotope labelling (1 hr) of extracellular  
610 parasites with 0.8 mM U-<sup>13</sup>C-L-tyrosine or 4 mM U-<sup>13</sup>C-L-isoleucine, metabolite  
611 extraction and subsequent GC-MS analysis were all performed as per (18), on an  
612 Agilent GC-MSD (7890B-5977A). Data analysis was carried out using GAVIN  
613 software (45).

#### 614 **RNA sequencing analysis**

615 *T. gondii* RNA was extracted as per the Qiagen RNA-easy mini kit user handbook  
616 (#74104) from  $\sim 5 \times 10^6$  *ApiAT5-3\_loxP* or *ApiAT5-3\_loxP*<sup>PdDiCre</sup> parasites at 0, 4 and  
617 60 hrs post RAP-treatment. Analysis was performed in triplicate. The FASTQ files  
618 were aligned using Bowtie 2 (46) to Ensembl Protist's release 35 of *T. gondii*  
619 (ToxoDB-7.1). They were then quantified using RSEM before being processed  
620 using Bioconductor (47). We used DESeq2 (48) to account for gene length and  
621 library size, and to test for the interaction between treatment and time point to  
622 generate the differential genelist. We corrected for multiple testing using the  
623 Benjamini-Hochberg procedure for false discovery rates. To validate the  
624 recodonised transcript, we both re-aligned to a custom genome rebuilt to include  
625 the novel sequence, and also used a pseudo-alignment approach to quantify purely  
626 the reads associated with the novel sequence (49).

627

## 628 **Acknowledgements**

629 We thank all members of the Treeck laboratory for critical discussions. We thank  
630 Giel Van Dooren and Sebastian Lourido for sharing unpublished data. We thank  
631 members of the following Science Technology platforms at the Francis Crick  
632 Institute: Bioinformatics, Advanced Sequencing, Peptide Synthesis, Proteomics  
633 and Flow Cytometry.

634

## 635 **References**

- 636 1. Lourido S, Moreno SN. The calcium signaling toolkit of the Apicomplexan  
637 parasites *Toxoplasma gondii* and *Plasmodium* spp. *Cell calcium*. 2015  
638 Mar;57(3):186–93.
- 639 2. Sidik SM, Hortua Triana MA, Paul AS, El Bakkouri M, Hackett CG, Tran F, et al.  
640 Using a Genetically Encoded Sensor to Identify Inhibitors of *Toxoplasma gondii*  
641 Ca<sup>2+</sup> Signalling. *The Journal of biological chemistry*. 2016 Mar 1;
- 642 3. Stewart RJ, Whitehead L, Nijagal B, Sleebs BE, Lessene G, McConville MJ, et al.  
643 Analysis of Ca<sup>2+</sup> mediated signalling regulating *Toxoplasma* infectivity reveals  
644 complex relationships between key molecules. *Cellular microbiology*. 2016 Oct  
645 26;
- 646 4. Carruthers VB, Sibley LD. Mobilization of intracellular calcium stimulates  
647 microneme discharge in *Toxoplasma gondii*. *Molecular microbiology*. 1999  
648 Jan;31(2):421–8.
- 649 5. Wetzel DM, Chen LA, Ruiz FA, Moreno SN, Sibley LD. Calcium-mediated  
650 protein secretion potentiates motility in *Toxoplasma gondii*. *Journal of cell*  
651 *science*. 2004 Nov 15;117(Pt 24):5739–48.
- 652 6. Endo T, Sethi KK, Piekarski G. *Toxoplasma gondii*: calcium ionophore A23187-  
653 mediated exit of trophozoites from infected murine macrophages. *Experimental*  
654 *parasitology*. 1982 Apr;53(2):179–88.
- 655 7. Lovett JL, Sibley LD. Intracellular calcium stores in *Toxoplasma gondii* govern  
656 invasion of host cells. *Journal of Cell Science*. 2003 Jul 15;116(14):3009–16.

- 657 8. Mondragon R, Frixione E. Ca(2+)-dependence of conoid extrusion in *Toxoplasma*  
658 *gondii* tachyzoites. *The Journal of eukaryotic microbiology*. 1996 Mar;43(2):120–  
659 7.
- 660 9. Black MW, Arrizabalaga G, Boothroyd JC. Ionophore-resistant mutants of  
661 *Toxoplasma gondii* reveal host cell permeabilization as an early event in egress.  
662 *Molecular and Cellular Biology*. 2000 Dec;20(24):9399–408.
- 663 10. Moudy R, Manning TJ, Beckers CJ. The loss of cytoplasmic potassium upon host  
664 cell breakdown triggers egress of *Toxoplasma gondii*. *Journal of Biological*  
665 *Chemistry*. 2001 Nov 2;276(44):41492–501.
- 666 11. McCoy JM, Whitehead L, van Dooren GG, Tonkin CJ. TgCDPK3 regulates  
667 calcium-dependent egress of *Toxoplasma gondii* from host cells. *PLoS pathogens*.  
668 2012;8(12):e1003066.
- 669 12. Lourido S, Tang K, Sibley LD. Distinct signalling pathways control *Toxoplasma*  
670 egress and host-cell invasion. *The EMBO journal*. 2012 Dec 12;31(24):4524–34.
- 671 13. Garrison E, Treeck M, Ehret E, Butz H, Garbuz T, Oswald BP, et al. A Forward  
672 Genetic Screen Reveals that Calcium-dependent Protein Kinase 3 Regulates  
673 Egress in *Toxoplasma*. *Plos Pathogens* [Internet]. 2012 Nov;8(11). Available  
674 from: [://WOS:000311997100060](https://pubmed.ncbi.nlm.nih.gov/23119971/)
- 675 14. Huang JF, Teyton L, Harper JF. Activation of a Ca<sup>2+</sup>-dependent protein kinase  
676 involves intramolecular binding of a calmodulin-like regulatory domain.  
677 *Biochemistry*. 1996;35(40):13222–30.
- 678 15. Wernimont AK, Amani M, Qiu W, Pizarro JC, Artz JD, Lin YH, et al. Structures  
679 of parasitic CDPK domains point to a common mechanism of activation. *Proteins*.  
680 2011 Mar;79(3):803–20.
- 681 16. Wernimont AK, Artz JD, Finerty P Jr, Lin YH, Amani M, Allali-Hassani A, et al.  
682 Structures of apicomplexan calcium-dependent protein kinases reveal mechanism  
683 of activation by calcium. *Nature structural & molecular biology*. 2010  
684 May;17(5):596–601.
- 685 17. Treeck M, Sanders JL, Gaji RY, LaFavers KA, Child MA, Arrizabalaga G, et al.  
686 The Calcium-Dependent Protein Kinase 3 of *Toxoplasma* Influences Basal  
687 Calcium Levels and Functions beyond Egress as Revealed by Quantitative  
688 Phosphoproteome Analysis. *Plos Pathogens* [Internet]. 2014 Jun;10(6). Available  
689 from: [://WOS:000338197400032](https://pubmed.ncbi.nlm.nih.gov/25400032/)
- 690 18. MacRae JI, Sheiner L, Nahid A, Tonkin C, Striepen B, McConville MJ.  
691 Mitochondrial Metabolism of Glucose and Glutamine Is Required for Intracellular  
692 Growth of *Toxoplasma gondii*. *Cell Host & Microbe*. 2012 Nov 15;12(5):682–92.
- 693 19. Parker KER, Fairweather SJ, Rajendran E, Blume M, McConville MJ, Broer S, et  
694 al. Characterization of the apicomplexan amino acid transporter (ApiAT) family  
695 in *Toxoplasma gondii*. *bioRxiv*. 2018 Apr 26;306993.

- 696 20. Hofmann. TMbase - A database of membrane spanning proteins segments. Biol  
697 Chem Hoppe-Seyler [Internet]. 1993 [cited 2018 May 25];374(166). Available  
698 from: <http://www.ch.embnet.org/documentation/mfc-35.pdf>
- 699 21. Thompson A, Schäfer J, Kuhn K, Kienle S, Schwarz J, Schmidt G, et al. Tandem  
700 Mass Tags: A Novel Quantification Strategy for Comparative Analysis of  
701 Complex Protein Mixtures by MS/MS. Analytical Chemistry. 2003  
702 Apr;75(8):1895–904.
- 703 22. Nebl T, Prieto JH, Kapp E, Smith BJ, Williams MJ, Yates 3rd JR, et al.  
704 Quantitative in vivo Analyses Reveal Calcium-dependent Phosphorylation Sites  
705 and Identifies a Novel Component of the Toxoplasma Invasion Motor Complex.  
706 PLOS Pathogens. 2011 Sep 29;7(9):e1002222.
- 707 23. Lourido S, Jeschke GR, Turk BE, Sibley LD. Exploiting the Unique ATP-Binding  
708 Pocket of Toxoplasma Calcium-Dependent Protein Kinase 1 To Identify Its  
709 Substrates. Acs Chemical Biology. 2013 Jun;8(6):1155–62.
- 710 24. Sidik SM, Huet D, Ganesan SM, Huynh M-H, Wang T, Nasamu AS, et al. A  
711 Genome-Wide CRISPR Screen in Toxoplasma Identifies Essential Apicomplexan  
712 Genes. Cell. 2016 Sep 8;166(6):1423-1435.e12.
- 713 25. Long S, Wang Q, Sibley LD. Analysis of non-canonical calcium dependent  
714 protein kinases in Toxoplasma gondii by targeted gene deletion using  
715 CRISPR/Cas9. Infection and immunity. 2016 Jan 11;
- 716 26. Gaji RY, Johnson DE, Treeck M, Wang M, Hudmon A, Arrizabalaga G.  
717 Phosphorylation of a Myosin Motor by TgCDPK3 Facilitates Rapid Initiation of  
718 Motility during Toxoplasma gondii egress. PLoS pathogens. 2015  
719 Nov;11(11):e1005268.
- 720 27. Liu K-H, Tsay Y-F. Switching between the two action modes of the dual-affinity  
721 nitrate transporter CHL1 by phosphorylation. The EMBO Journal. 2003  
722 received;22(5):1005–13.
- 723 28. Jang H-Y, Rhee J, Carlson JE, Ahn S-J. The Camelina aquaporin CsPIP2;1 is  
724 regulated by phosphorylation at Ser273, but not at Ser277, of the C-terminus and  
725 is involved in salt- and drought-stress responses. Journal of Plant Physiology.  
726 2014 Sep 15;171(15):1401–12.
- 727 29. Lee SC, Lan W-Z, Kim B-G, Li L, Cheong YH, Pandey GK, et al. A protein  
728 phosphorylation/dephosphorylation network regulates a plant potassium channel.  
729 PNAS. 2007 Oct 2;104(40):15959–64.
- 730 30. Tamura N, Oku M, Ito M, Noda NN, Inagaki F, Sakai Y. Atg18  
731 phosphoregulation controls organellar dynamics by modulating its  
732 phosphoinositide-binding activity. J Cell Biol. 2013 Aug 19;202(4):685–98.
- 733 31. Ramamoorthy S, Shippenberg TS, Jayanthi LD. Regulation of Monoamine  
734 Transporters: Role of Transporter Phosphorylation. Pharmacology & therapeutics.  
735 10;129(2):220–38.

- 736 32. Aryal B, Laurent C, Geisler M. Learning from each other: ABC transporter  
737 regulation by protein phosphorylation in plant and mammalian systems.  
738 *Biochemical Society Transactions*. 2015 Oct 1;43(5):966–74.
- 739 33. Marino ND, Boothroyd JC. *Toxoplasma* growth in vitro is dependent on  
740 exogenous tyrosine and is independent of AAH2 even in tyrosine-limiting  
741 conditions. *Exp Parasitol*. 2017 Feb 28;
- 742 34. Abramian AM, Comenencia-Ortiz E, Modgil A, Vien TN, Nakamura Y, Moore  
743 YE, et al. Neurosteroids promote phosphorylation and membrane insertion of  
744 extrasynaptic GABAA receptors. *PNAS*. 2014 May 13;111(19):7132–7.
- 745 35. Rice WL, Zhang Y, Chen Y, Matsuzaki T, Brown D, Lu HAJ. Differential,  
746 Phosphorylation Dependent Trafficking of AQP2 in LLC-PK1 Cells. Rappoport  
747 JZ, editor. *PLoS ONE*. 2012 Feb 28;7(2):e32843.
- 748 36. Nissen-Meyer LSH, Popescu MC, Hamdani EH, Chaudhry FA. Protein Kinase C-  
749 Mediated Phosphorylation of a Single Serine Residue on the Rat Glial Glutamine  
750 Transporter SN1 Governs Its Membrane Trafficking. *J Neurosci*. 2011 Apr  
751 27;31(17):6565–75.
- 752 37. Wang ZT, Verma SK, Dubey JP, Sibley LD. The aromatic amino acid  
753 hydroxylase genes AAH1 and AAH2 in *Toxoplasma gondii* contribute to  
754 transmission in the cat. *PLOS Pathogens*. 2017 Mar 13;13(3):e1006272.
- 755 38. Babbitt SE, Altenhofen L, Cobbold SA, Istvan ES, Fennell C, Doerig C, et al.  
756 *Plasmodium falciparum* responds to amino acid starvation by entering into a  
757 hibernatory state. *PNAS*. 2012 Nov 20;109(47):E3278–87.
- 758 39. Gibson DG, Benders GA, Andrews-Pfannkoch C, Denisova EA, Baden-Tillson H,  
759 Zaveri J, et al. Complete chemical synthesis, assembly, and cloning of a  
760 *Mycoplasma genitalium* genome. *Science*. 2008 Feb 29;319(5867):1215–20.
- 761 40. Saeij JPJ, Boyle JP, Collier S, Taylor S, Sibley LD, Brooke-Powell ET, et al.  
762 Polymorphic Secreted Kinases Are Key Virulence Factors in Toxoplasmosis.  
763 *Science*. 2006 Dec 15;314(5806):1780–3.
- 764 41. Soldati D, Boothroyd JC. Transient transfection and expression in the obligate  
765 intracellular parasite *Toxoplasma gondii*. *Science*. 1993 Apr 16;260(5106):349–  
766 52.
- 767 42. Andenmatten N, Egarter S, Jackson AJ, Jullien N, Herman J-P, Meissner M.  
768 Conditional genome engineering in *Toxoplasma gondii* uncovers alternative  
769 invasion mechanisms. *Nature Methods*. 2013 Feb;10(2):125–7.
- 770 43. Shen B, Brown KM, Lee TD, Sibley LD. Efficient gene disruption in diverse  
771 strains of *Toxoplasma gondii* using CRISPR/CAS9. *mBio*. 2014;5(3):e01114-14.
- 772 44. Woodrow CJ, Penny JI, Krishna S. Intraerythrocytic *Plasmodium falciparum*  
773 expresses a high affinity facilitative hexose transporter. *J Biol Chem*. 1999 Mar  
774 12;274(11):7272–7.

- 775 45. Behrends V, Tredwell GD, Bundy JG. A software complement to AMDIS for  
776 processing GC-MS metabolomic data. *Anal Biochem.* 2011 Aug 15;415(2):206–  
777 8.
- 778 46. Langmead B, Salzberg SL. Fast gapped-read alignment with Bowtie 2. *Nat Meth.*  
779 2012 print;9:357–9.
- 780 47. Huber W, Carey VJ, Gentleman R, Anders S, Carlson M, Carvalho BS, et al.  
781 Orchestrating high-throughput genomic analysis with Bioconductor. *Nat*  
782 *Methods.* 2015 Feb;12:115–21.
- 783 48. Love MI, Huber W, Anders S. Moderated estimation of fold change and  
784 dispersion for RNA-seq data with DESeq2. *Genome Biology.* 2014;15:1–21.
- 785 49. Bray NL, Pimentel H, Melsted P, Pachter L. Near-optimal probabilistic RNA-seq  
786 quantification. *Nat Biotechnol.* 2016 May;34:525–7.
- 787
- 788



## 789 **Figure Legends**

### 790 **Fig 1. ApiATP5-3 localises to the plasma membrane and is phosphorylated at serine** 791 **56 upon ionophore treatment**

792 **(A)** Topology prediction of ApiAT5-3. Serine 56 is predicted to be located on the  
793 luminal side of the parasite **(B)** Quantification of the phosphorylation state of  
794 residues in the ApiAT5-3 N-terminus in *TgCDPK3* KOs and during ionophore-  
795 induced egress (from (17)). Upper panel: The heatmap shows differential  
796 phosphorylation of S56 in *TgCDPK3* mutants compared to WT parasites, but not  
797 any other of the identified phosphorylation sites. Intracellular (IC) and  
798 extracellular (EC) parasites with and without 1  $\mu$ M ionophore (iono). P-site =  
799 phosphorylation site. Numbers represent residue position. Black 'x' =  
800 phosphorylation site not identified. Fold changes are  $\log^2$ . Bottom panel: Change  
801 in relative phosphorylation of ApiAT5-3 and proteins with previously described  
802 ionophore-dependent phosphorylation sites, measured after addition of 8  $\mu$ M  
803 ionophore over 60 s. Numbers after the identifier represent the phosphorylation  
804 site quantified. **(C)** ApiAT5-3 was detected by Western blot analysis of ApiAT5-  
805 3::HA cell lysate using anti-HA antibody. **(D)** IFA of ApiAT5-3::HA expressing  
806 parasites shows that ApiAT5-3 localises to the periphery of the intracellular  
807 tachyzoite. Green = HA. Scale bar 10  $\mu$ m.

808

### 809 **Fig 2. ApiAT5-3 is essential for parasite proliferation**

810 **(A)** Generation of the ApiAT5-3\_loxP line using CRISPR/Cas9 to increase site-  
811 directed integration. Protospacer adjacent motif (PAM) indicated by black arrows.  
812 Primer pairs represented by coloured triangles. **(B)** Left panel: PCR analysis  
813 shows correct integration of the ApiAT5-3\_loxP construct at both the 3' and 5'



814 ends and a loss of WT *apiAT5-3* at the endogenous locus. White \* = non-specific  
815 bands. Right panel: Addition of RAP leads to correct recombination of the loxP  
816 sites. **(C)** Fluorescent microscopy of ApiAT5-3\_loxP parasites 24 hrs after addition  
817 of DMSO or RAP. Scale bar 5  $\mu$ m **(D)** Plaque assay showing loss of plaquing  
818 capacity of ApiAT5-3\_loxP parasites upon RAP-treatment. **(E)** Parasite per vacuole  
819 number shown as mean %. n=3 **(F)** Stills from live video microscopy at 36, 42 and  
820 45 hrs into 3<sup>rd</sup> lytic cycle post RAP-treatment. Red = RH Tom, dashed white line =  
821 WT ApiAT5-3\_loxP, green = *apiAT5-3* KO. **(G)** Ionophore induced egress assay  
822 showing no significant difference between DMSO and RAP-treated ApiAT5-3\_loxP  
823 (at 30 hrs into lytic cycle 2 post DMSO/RAP-treatment). Statistical analysis using  
824 multiple comparison 2-way ANOVA, n = 3.

825

826 **Fig 3.  $\Delta$ *apiAT5-3* parasites display a transcriptional response related to amino acid**  
827 **starvation**

828 **(A)** Extracted reads for recodonised *apiAT5-3* from RNA sequence data show a  
829 significant reduction of *apiAT5-3* transcripts in RAP-treated ApiAT5-3\_loxP lines  
830 60 hrs post RAP-treatment compared to RAP-treated ApiAT5-3\_loxP<sup>dDiCre</sup>  
831 parasites. **(B)** Heatmap of genes that change significantly (adjusted p <0.05) in  
832 transcript read number between WT and  $\Delta$ *apiAT5-3* 60 hrs post addition of RAP.  
833 **(C)** Gene ontology term enrichment shows that genes involved in translation  
834 processes are significantly enriched among the differentially expressed genes 60  
835 hrs post RAP-treatment.

836

837 **Fig 4.  $\Delta$ apiAT5-3<sup>ApiAT5-3\_S56A</sup> demonstrates a fitness defect**

838 **(A)** Generation of the ApiAT5-3<sup>ApiAT5-3/\_S56A/\_S56D</sup> complementation lines. PAM  
839 indicated by black arrow. Primer pairs represented by coloured triangles. **(B)** PCR  
840 analysis shows correct integration of the ApiAT5-3\_loxP construct at both the 3'  
841 and 5' ends and a loss of *uprt*. White \* = non-specific band **(C)** IFA of ApiAT5-  
842 3<sup>ApiAT5-3/\_S56A/\_S56D\_HA</sup> expressing parasites shows that ApiAT5-3 is correctly  
843 trafficked to the periphery of the intracellular tachyzoite in both the presence  
844 (DMSO) and absence (Rapamycin) of the endogenous *apiAT5-3*. Red = HA. Green  
845 = YFP, indicating correct excision of the endogenous *apiAT5-3*. Scale bar 10  $\mu$ m.  
846 **(D)** Growth competition assay by flow cytometry shows that  $\Delta$ apiAT5-3<sup>ApiAT5-3\_S56A</sup>  
847 parasite growth is reduced relative to the non-excised ApiAT5-3<sup>ApiAT5-3\_S56A</sup> line.  
848 Statistical analysis using multiple comparison, 2-way ANOVA of mean ratio to day  
849 0 normalised to 1. \*\*\*p <0.001, n = 3.

850

851 **Fig 5. Functional analysis of the ApiAT5-3 transporter**

852 **(A)** *X. laevis* oocytes expressing ApiAT5-3 demonstrate a significant increase in  
853 <sup>14</sup>C-L-tyrosine uptake. 10 oocytes per experiment. Analysis carried out using a  
854 two-tailed, paired, Student's t-test. \*\*\*p <0.001 Box plots show mean, 1<sup>st</sup> and 3<sup>rd</sup>  
855 quartile and SD, n= 5. **(B)** Extracellular, RAP-treated, ApiAT5-3\_loxP tachyzoites,  
856 labelled with <sup>13</sup>C-L-tyrosine or <sup>13</sup>C-L-isoleucine, display a marked decrease in  
857 tyrosine but not isoleucine import, relative to WT. n=2. **(C)** Plaque assay shows no  
858 rescue of growth of RAP-treated ApiAT5-3\_loxP on addition of excess (2 mM) L-  
859 tyrosine. **(D)** *X. laevis* oocytes expressing *apiAT5-3\_S56A* demonstrate a modest  
860 but insignificant reduction in <sup>14</sup>C-L-tyrosine uptake relative to *apiAT5-3* and  
861 *apiAT5-3\_S56D*. 10 oocytes per experiment \*\*\*\*p <0.0001, ns = non-significant.

862 Analysis carried out using multiple comparison, one-way ANOVA. Box plots show  
863 mean, 1<sup>st</sup> and 3<sup>rd</sup> quartile and SD, n= 5.

## 864 **Supporting information**

865

866 **S1 Fig. ApiAT5-3\_loxP parasites that survive RAP-treatment retain the *apiAT5-3***  
867 **gene.**

868 PCR analysis using primers spanning the floxed *apiAT5-3* gene show that the small  
869 proportion of non-excised parasites present after RAP-treatment outgrow the  
870 excised  $\Delta$ *apiAT5-3* parasites within 2 weeks.

871

872 **S2 Fig. Verification of ApiAP5-3 complementation lines.**

873 **(A)** Addition of RAP to the complemented parasite lines leads to correct  
874 recombination of the loxP sites and deletion of the endogenous *apiAT5-3* gene. **(B)**  
875 Plaque assay showing restoration of plaquing efficiency upon RAP-treatment of  
876 the ApiAT5-3\_loxP line complemented with the WT or phosphomutant versions of  
877 the gene.

878

879 **S3 Fig. Analysis of ApiAP5-3 transport function.**

880 **(A)** *X. laevis* oocytes expressing *apiAT5-3* demonstrate an increase in <sup>14</sup>C-L-  
881 phenylalanine uptake but no significant <sup>14</sup>C-L-valine uptake. 10 oocytes per  
882 experiment. Analysis carried out using a two-tailed, paired, Student's t-test. \*p  
883 <0.05, ns = non-significant. n= 2. **(B)** Relative abundance of amino acids in RAP-  
884 treated ApiAT5-3\_loxP (KO) relative to  $\Delta$ *apiATP5-3*<sup>ApiAT5-3</sup> (WT), shows that  
885 tyrosine is the most significantly reduced upon loss of ApiAT5-3. **(C)** Tyrosine

886 abundance in normal DMEM compared to DMEM supplemented with 2 mM  
887 tyrosine.

888

889 **S1 Movie. Live video microscopy of  $\Delta$ *apiAT5-3* parasites**

890 Live video microscopy of *ApiAT5-3\_loxP* parasites 29 hrs into the 3<sup>rd</sup> lytic cycle  
891 post DMSO- **(A)** or RAP- **(B)** treatment. Red = WT RH Tom, colourless parasites =  
892 non-excised *ApiAT5-3\_loxP*, green parasites = YFP expressing *apiAT5-3* KO.

893 **S1 Table. Primers and synthetic DNA sequences used throughout this study.**

894 **S2 Table. *Toxoplasma gondii* strains generated throughout this study.**

895 **S3 Table. RNA sequencing analysis of *apiAT5-3* conditional KO**

896 A list of all genes displaying  $\log^2$  fold change in the RAP-treated  $\Delta$ *apiAT5-3*<sup>*ApiAT5-3*</sup>  
897 compared to *ApiAT5-3\_loxP* parasites, 4 and 60 hrs after RAP-treatment.

898

A

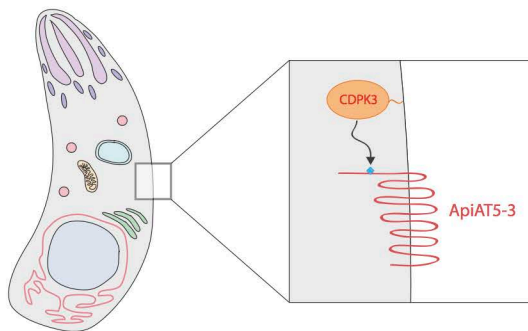

C

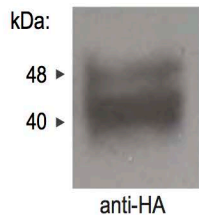

D

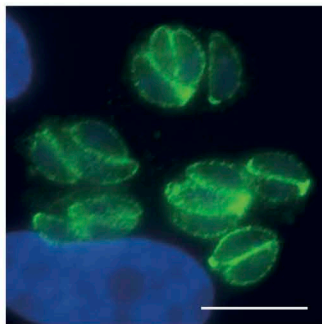

B

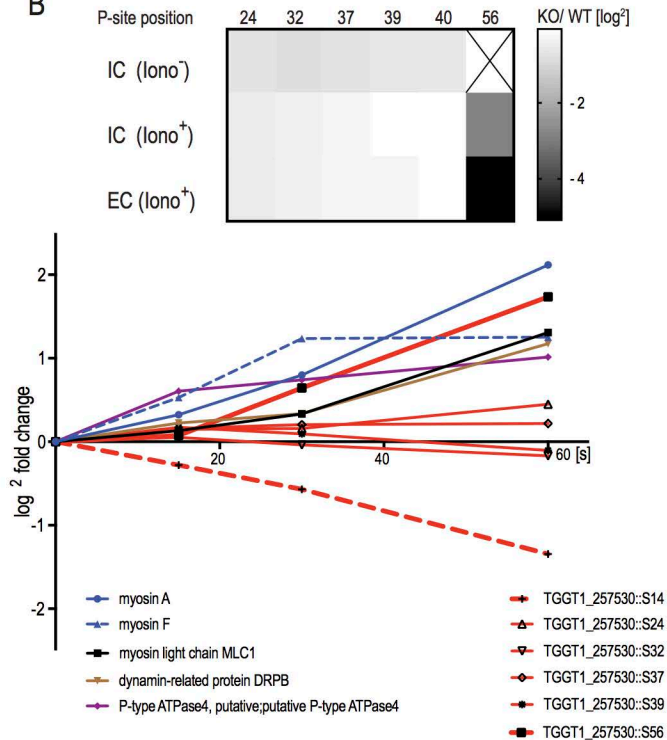

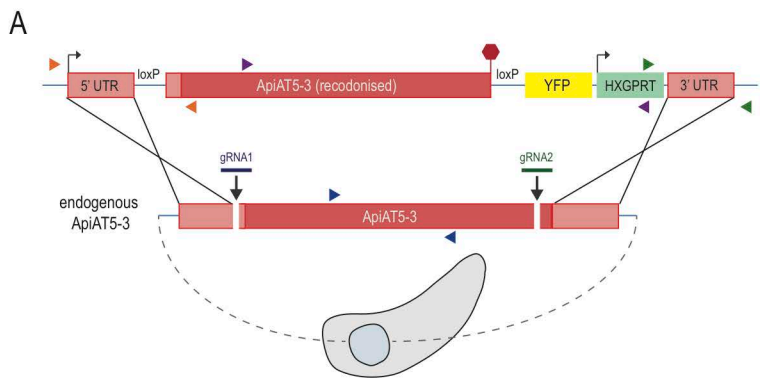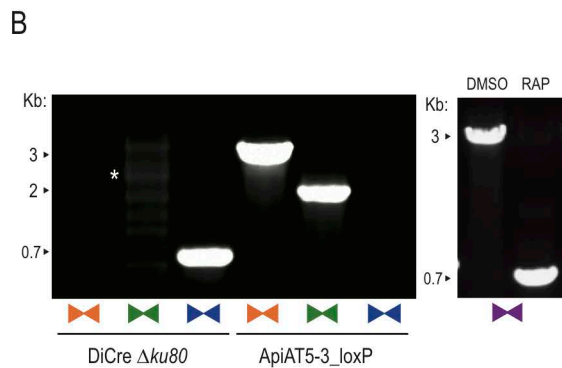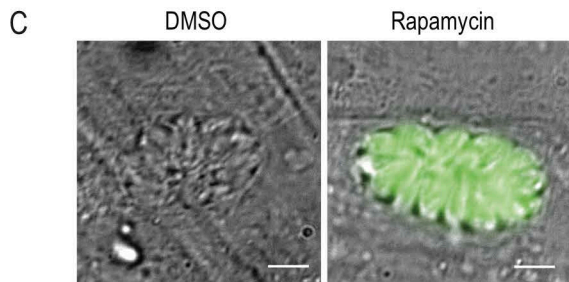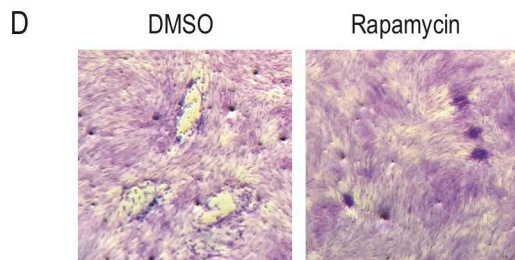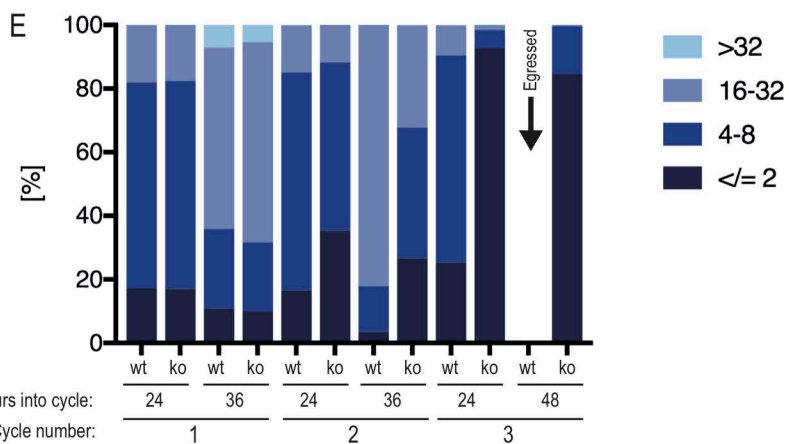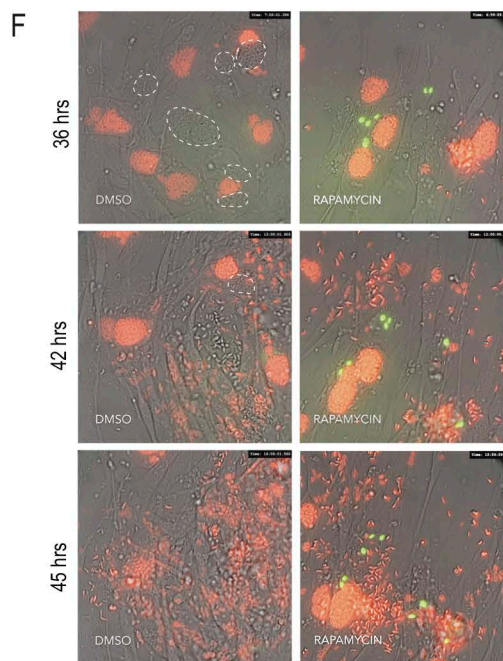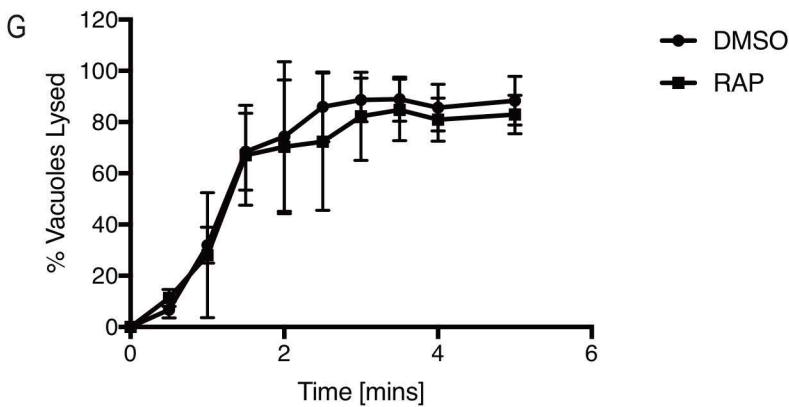

A

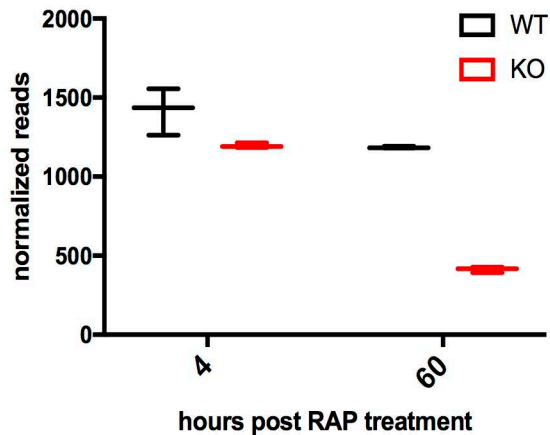

B

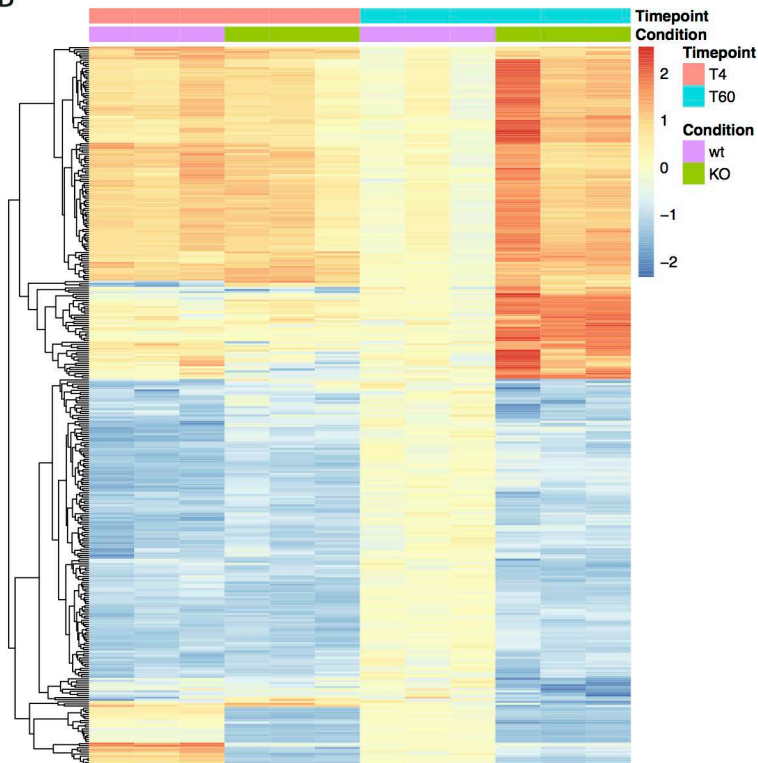

C

| Biological process                           | Enrichment | Odds ratio | P-value  | Benjamini | Bonferroni |
|----------------------------------------------|------------|------------|----------|-----------|------------|
| translation                                  | 5.41       | 10.79      | 5.75E-38 | 1.38E-36  | 1.38E-36   |
| biosynthetic process                         | 2.65       | 4.06       | 2.28E-19 | 2.73E-18  | 5.46E-18   |
| cellular nitrogen compound metabolic process | 2.15       | 3.09       | 3.48E-14 | 2.78E-13  | 8.35E-13   |
| biological process                           | 1.26       | 1.93       | 1.77E-06 | 1.06E-05  | 4.25E-05   |
| cellular protein modification process        | 1.42       | 1.52       | 4.60E-02 | 2.21E-01  | 1.00E+00   |



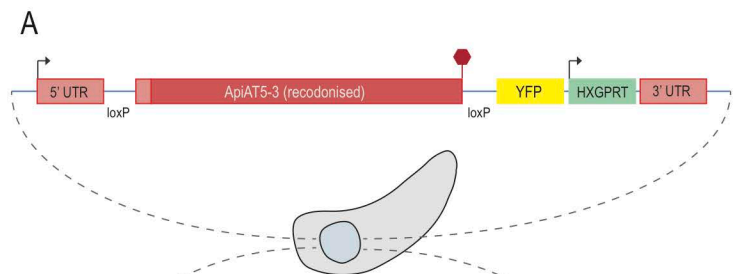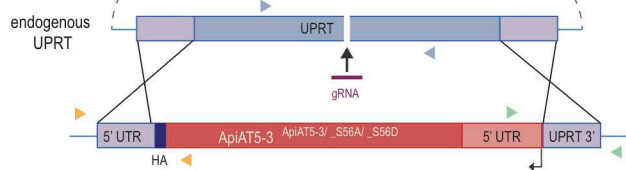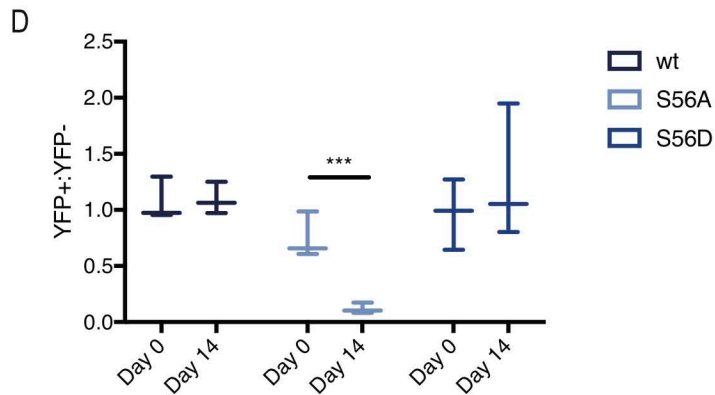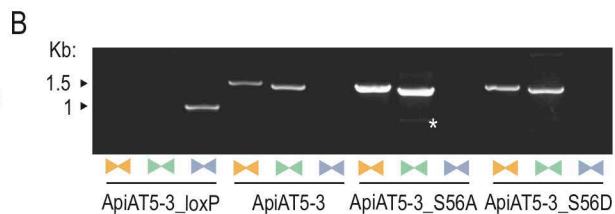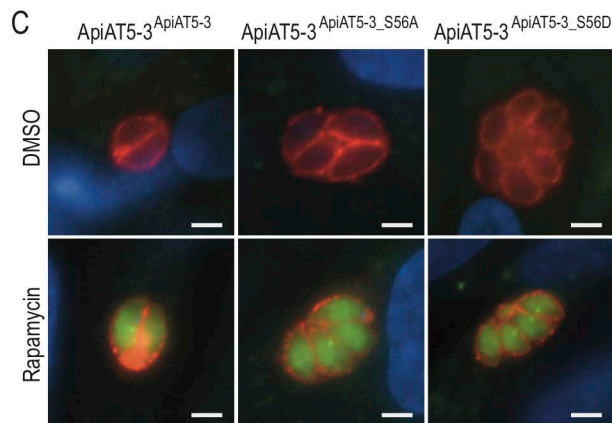



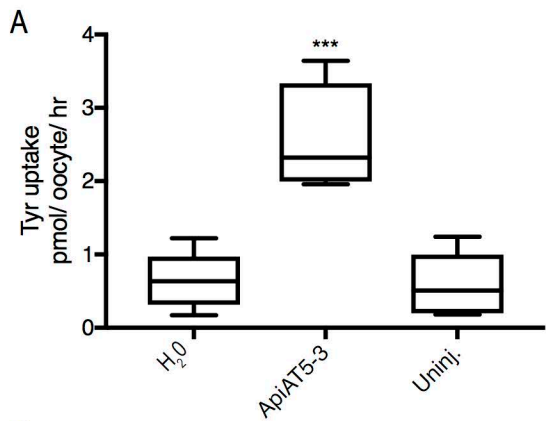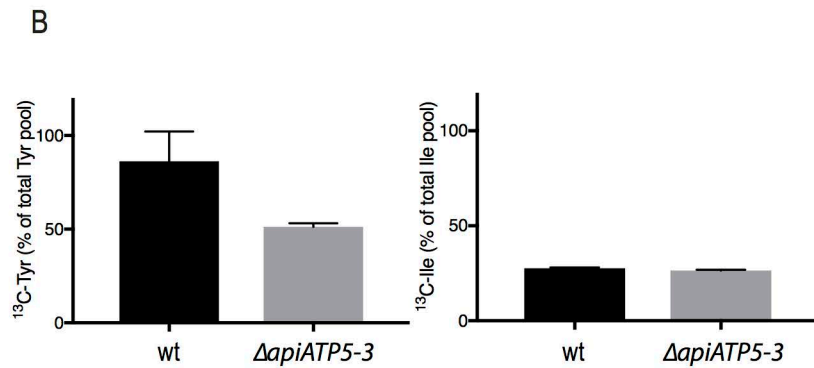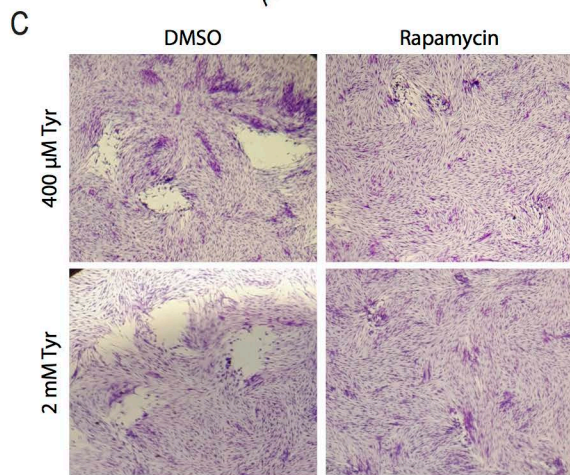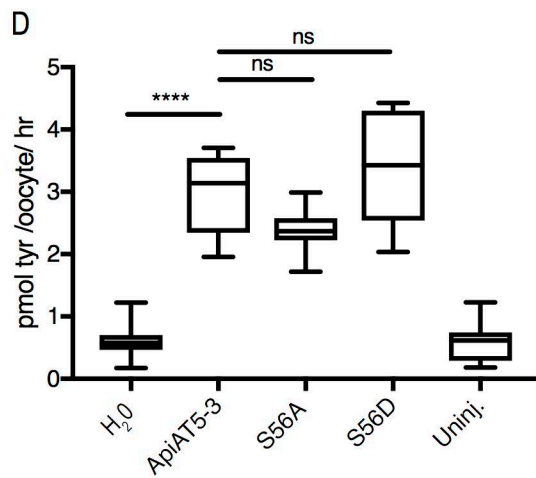

Source: http://biorxiv.org/content/10.1101/339671v2.full.pdf
